# Supplementary material for: Urolithiasis in patients with inflammatory bowel disease: A systematic review and meta-analysis of 13,339,065 individuals
Source: PubMed Central journal article supplement — Medicine (Baltimore). 2023 Jun 16;102(24):e33938. doi: 10.1097/MD.0000000000033938 (PMC10270553; doi:10.1097/md.0000000000033938), 2023-06-16
Supplement: medi-102-e33938-s001.pdf [file medi-102-e33938-s001.pdf]

sTable 1: Searched databases and the used keywords

| Database | Search term                                                                                                                                                                                                                                                                                                                                                                                                                                                                                                                                                                                                                                                                                                                                                                                                                                                                                                                                                                                                 | Results |
|----------|-------------------------------------------------------------------------------------------------------------------------------------------------------------------------------------------------------------------------------------------------------------------------------------------------------------------------------------------------------------------------------------------------------------------------------------------------------------------------------------------------------------------------------------------------------------------------------------------------------------------------------------------------------------------------------------------------------------------------------------------------------------------------------------------------------------------------------------------------------------------------------------------------------------------------------------------------------------------------------------------------------------|---------|
| PubMed   | ("Kidney Calculi"[MeSH] OR Calculi, Kidney OR Calculus, Kidney OR Kidney Calculus OR Nephrolith OR Renal Calculus OR Kidney Stones OR Kidney Stone OR Stone, Kidney OR Stones, Kidney OR Renal Calculi OR Calculi, Renal OR Calculus, Renal OR Urinary Lithiasis OR Lithiasis, Urinary OR urolithiasis) AND ("Colitis, Ulcerative"[MeSH] OR Idiopathic Proctocolitis OR Ulcerative Colitis OR Colitis Gravis OR Inflammatory Bowel Disease, Ulcerative Colitis Type OR "Crohn Disease"[MeSH] OR Crohn's Enteritis OR Regional Enteritis OR Crohn's Disease OR Crohns Disease OR Inflammatory Bowel Disease 1 OR Enteritis, Granulomatous OR Granulomatous Enteritis OR Enteritis, Regional OR Ileocolitis OR Colitis, Granulomatous OR Granulomatous Colitis OR Ileitis, Terminal OR Terminal Ileitis OR Ileitis, Regional OR Regional Ileitides OR Regional Ileitis OR "Inflammatory Bowel Diseases"[MeSH] OR Bowel Diseases, Inflammatory)                                                                | 265     |
| Scopus   | TITLE-ABS-KEY(("Kidney Calculi" OR "Calculi, Kidney" OR "Calculus, Kidney" OR "Kidney Calculus" OR "Nephrolith" OR "Renal Calculus" OR "Kidney Stones" OR "Kidney Stone" OR "Stone, Kidney" OR "Stones, Kidney" OR "Renal Calculi" OR "Calculi, Renal" OR "Calculus, Renal" OR "Urinary Lithiasis" OR "Lithiasis, Urinary" OR "urolithiasis") AND ("Colitis, Ulcerative" OR "Idiopathic Proctocolitis" OR "Ulcerative Colitis" OR "Colitis Gravis" OR "Inflammatory Bowel Disease, Ulcerative Colitis Type" OR "Crohn Disease" OR "Crohn's Enteritis" OR "Regional Enteritis" OR "Crohn's Disease" OR "Crohns Disease" OR "Inflammatory Bowel Disease 1" OR "Enteritis, Granulomatous" OR "Granulomatous Enteritis" OR "Enteritis, Regional" OR "Ileocolitis" OR "Colitis, Granulomatous" OR "Granulomatous Colitis" OR "Ileitis, Terminal" OR "Terminal Ileitis" OR "Ileitis, Regional" OR "Regional Ileitides" OR "Regional Ileitis" OR "Inflammatory Bowel Diseases" OR "Bowel Diseases, Inflammatory")) | 376     |
| WOS      | TS=(("Kidney Calculi" OR Calculi, Kidney OR Calculus, Kidney OR Kidney Calculus OR Nephrolith OR Renal Calculus OR Kidney Stones OR Kidney Stone OR Stone, Kidney OR Stones, Kidney OR Renal Calculi OR Calculi, Renal OR Calculus, Renal OR Urinary Lithiasis OR Lithiasis, Urinary OR urolithiasis) AND ("Colitis, Ulcerative" OR Idiopathic Proctocolitis OR Ulcerative Colitis OR Colitis Gravis OR Inflammatory Bowel Disease, Ulcerative Colitis Type OR "Crohn Disease" OR Crohn's Enteritis OR Regional Enteritis OR Crohn's Disease OR Crohns Disease OR Inflammatory Bowel Disease 1 OR Enteritis, Granulomatous OR Granulomatous Enteritis OR Enteritis, Regional OR Ileocolitis OR Colitis, Granulomatous OR Granulomatous Colitis OR Ileitis, Terminal OR Terminal Ileitis OR Ileitis, Regional OR Regional Ileitides OR Regional Ileitis OR "Inflammatory Bowel Diseases" OR Bowel Diseases, Inflammatory))                                                                                   | 166     |
| Medline  | TS=(("Kidney Calculi" OR Calculi, Kidney OR Calculus, Kidney OR Kidney Calculus OR Nephrolith OR Renal Calculus OR Kidney Stones OR Kidney Stone OR Stone, Kidney OR Stones, Kidney OR Renal Calculi OR Calculi, Renal OR Calculus, Renal OR Urinary Lithiasis OR Lithiasis, Urinary OR urolithiasis) AND ("Colitis, Ulcerative" OR Idiopathic Proctocolitis OR Ulcerative Colitis OR Colitis Gravis OR Inflammatory Bowel Disease, Ulcerative Colitis Type OR "Crohn Disease" OR Crohn's Enteritis OR Regional Enteritis OR Crohn's Disease OR Crohns Disease OR Inflammatory Bowel Disease 1 OR Enteritis, Granulomatous OR Granulomatous Enteritis OR Enteritis, Regional OR Ileocolitis OR Colitis, Granulomatous OR Granulomatous Colitis OR Ileitis, Terminal OR Terminal Ileitis OR Ileitis, Regional OR Regional Ileitides OR Regional Ileitis OR "Inflammatory Bowel Diseases" OR Bowel Diseases, Inflammatory))                                                                                   | 231     |

|      |                                                                                                                                                                                                                                                                                                                                                                                                                                                                                                                                                                                                                                                                                                                                                                                                                                                                                                                                                                                                                          |     |
|------|--------------------------------------------------------------------------------------------------------------------------------------------------------------------------------------------------------------------------------------------------------------------------------------------------------------------------------------------------------------------------------------------------------------------------------------------------------------------------------------------------------------------------------------------------------------------------------------------------------------------------------------------------------------------------------------------------------------------------------------------------------------------------------------------------------------------------------------------------------------------------------------------------------------------------------------------------------------------------------------------------------------------------|-----|
| OVID | <p>1: "Colitis, Ulcerative" or "Idiopathic Proctocolitis" or "Ulcerative Colitis" or "Colitis Gravis" or "Inflammatory Bowel Disease, Ulcerative Colitis Type" or "Crohn Disease" or "Crohn's Enteritis" or "Regional Enteritis" or "Crohn's Disease" or "Crohns Disease" or "Inflammatory Bowel Disease 1" or "Enteritis, Granulomatous" or "Granulomatous Enteritis" or "Enteritis, Regional" or "Ileocolitis" or "Colitis, Granulomatous" or "Granulomatous Colitis" or "Ileitis, Terminal" or "Terminal Ileitis" or "Ileitis, Regional" or "Regional Ileitides" or "Regional Ileitis" or "Inflammatory Bowel Diseases" or "Bowel Diseases, Inflammatory"</p> <p>2: ("Kidney Calculi" or "Calculi, Kidney" or "Calculus, Kidney" or "Kidney Calculus" or "Nephrolith" or "Renal Calculus" or "Kidney Stones" or "Kidney Stone" or "Stone, Kidney" or "Stones, Kidney" or "Renal Calculi" or "Calculi, Renal" or "Calculus, Renal" or "Urinary Lithiasis" or "Lithiasis, Urinary" or "urolithiasis"</p> <p>1 AND 2</p> | 142 |
|------|--------------------------------------------------------------------------------------------------------------------------------------------------------------------------------------------------------------------------------------------------------------------------------------------------------------------------------------------------------------------------------------------------------------------------------------------------------------------------------------------------------------------------------------------------------------------------------------------------------------------------------------------------------------------------------------------------------------------------------------------------------------------------------------------------------------------------------------------------------------------------------------------------------------------------------------------------------------------------------------------------------------------------|-----|
