# Supplementary material for: Urolithiasis in patients with inflammatory bowel disease: A systematic review and meta-analysis of 13,339,065 individuals
Source: PubMed Central journal article supplement — Medicine (Baltimore). 2023 Jun 16;102(24):e33938. doi: 10.1097/MD.0000000000033938 (PMC10270553; doi:10.1097/md.0000000000033938), 2023-06-16
Supplement: medi-102-e33938-s002.pdf [file medi-102-e33938-s002.pdf]

## Supplemental Figure 1: Quality assessment of included studies

### Quality assessment of Cohort studies

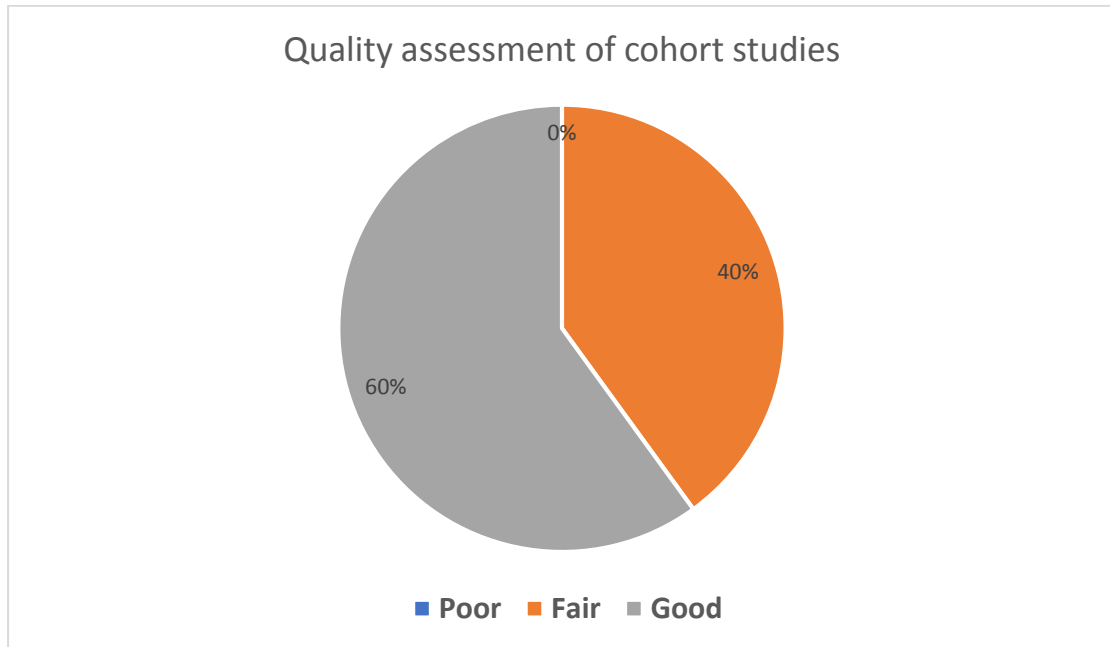

### Quality assessment of case-control studies

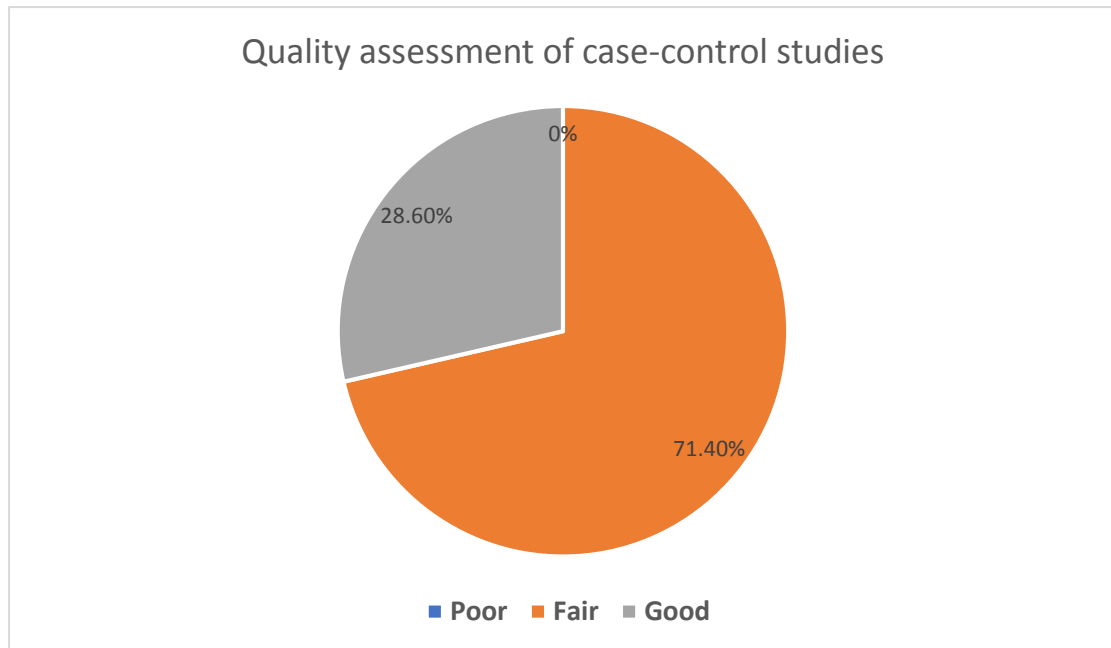

0
